# Supplementary material for: Direct observation of guanine photo-oxidation from new potential anticancer drugs via ultrafast electron transfer
Source: Royal Society of Chemistry journal article supplement (doi:10.1039/d4ma00428k), 2024-01-01
Supplement: d4ma00428k1.pdf [file d4ma00428k1.pdf]

## SUPPORTING INFORMATION

### **Direct Observation of Guanine Photo-Oxidation from New Potential Anticancer Drugs Via Ultrafast Electron Transfer**

Alessio Cesaretti,<sup>a</sup> Giulia Pantella,<sup>a</sup> Gianmarco Reali,<sup>a</sup> Giuseppe Consiglio,<sup>b</sup> Cosimo G. Fortuna,<sup>b</sup> Fausto Elisei,<sup>a</sup> Anna Spalletti<sup>a</sup> and Benedetta Carlotti<sup>a,\*</sup>

<sup>a</sup>Department of Chemistry, Biology and Biotechnology and “Centro di Eccellenza Materiali Innovativi Nanostrutturati” (CEMIN) University of Perugia, Via Elce di Sotto 8, 06123 Perugia, Italy. Email: benedetta.carlotti@unipg.it.

<sup>b</sup>Department of Chemical Sciences, University of Catania, viale Andrea Doria 6, 95125 Catania, Italy.

## Experimental Section

The investigated compounds **A-C** were synthesized for previous studies.<sup>1-4</sup> Spectral and photophysical measurements were carried out in ETN (1 mM EDTA, 10 mM Tris-HCl, 10 mM NaCl) aqueous buffered solutions at pH 7.2. Ethylenediaminetetraacetic acid (EDTA), tris(hydroxymethyl)aminomethane hydrochloride (Tris-HCl), and NaCl were purchased from Sigma-Aldrich. Adenosine-5'-triphosphate (ATP), Cytidine-5'-triphosphate (CTP), Guanosine-5'-triphosphate (GTP) and Thymidine-5'-triphosphate (TTP) were purchased from Sigma-Aldrich.

Absorption spectra were measured with a Cary 4E (Varian) spectrophotometer, while fluorescence spectra, with appropriate corrections for the instrumental response, were detected by a FluoroMax-4P spectrofluorimeter (HORIBA Scientific) operated by FluorEssence. The fluorescence quantum yields ( $\phi_F$ , experimental error  $\pm 10\%$ ) of dilute solutions ( $1 \times 10^{-6}$  M) of the dyes alone and in the presence of ca. 5 mM nucleotides were obtained exciting each sample at the relative maximum absorption wavelength by employing tetracene ( $\phi_F = 0.17$  in air-equilibrated cyclohexane) as reference compound.<sup>5</sup> Fluorescence lifetimes were measured through an Edinburgh Instrument 199S spectrofluorometer equipped with the single photon counting technique. A LED centered at 450 nm was used as the light source (temporal resolution = 0.5 ns). The experimental error on the fluorescence lifetimes is  $\pm 10\%$ .

Spectrophotometric and fluorimetric titrations were performed by adding increasing volumes of ATP and GTP stock solutions ( $C \approx 5$  mM) into the cuvette containing the solution of the studied compounds. The initial volume was 2 mL and the total volume of nucleotides added at the end of the titration ranged from 1.2 and 1.6 mL. After mixing nucleotides with the investigated compounds at every addition, it was observed that equilibrium was quickly reached, allowing spectra to be recorded after waiting a standard time of 5 minutes. Each absorption spectrum was multiplied for the relative dilution factor, while emission spectra were corrected by taking into account the changes in absorbance at the excitation wavelength after every addition. Fluorescence data were processed by means of non-linear fitting to a modified Stern-Volmer equation<sup>1</sup> which gave values for the binding constants (K) between each compound and ATP or GTP.

$$\frac{Area_F}{Area_{F,0}} = \frac{1 + \Delta Area_F \times K[Nucleotide]}{1 + K[Nucleotide]} \quad \text{eq. 1}$$

The determination of  $\phi_F$  for the ATP/compound or GTP/compound complexes was conducted by comparison of the emission spectra of the free ligand ( $Area_{F,0}$ ), used as internal standard, and that of the bound molecule recorded after each

addition of nucleotide during the titration ( $Area_F$ ) corrected for the fraction of absorbed light:

$$\Phi_{F,complex} = \frac{Area_F}{Area_{F,0}} \times \Phi_{F,0}$$

Ultrafast time-resolved transient absorption and fluorescence up-conversion measurements were carried out by using Helios and Halcyone setups (Ultrafast System), already described elsewhere.<sup>6,7</sup> Femtosecond excitation pulses at 400 nm of ca. 40 fs were generated by using an amplified Ti:sapphire laser system. In the transient absorption setup, the pump pulses were passed through a chopper that cut out every second pulse and collimated to the sample in a 2 mm quartz cuvette. Probe pulses for optical measurements were produced by passing a small portion of 800 nm light to an optical delay line with a time window of 3200 ps and focusing it into a 2 mm thick sapphire crystal to generate a white-light continuum in the 450–800 nm range. The white light was focused onto the sample and the differential absorbance ( $\Delta A$ ) in the presence and absence of pump excitation was revealed by a CCD detector at each delay. In the up-conversion setup, the 400-nm pulse excites the sample whereas the fundamental laser beam acts as the “gate” light, after passing through a delay line, which is then summed to the sample emission promoting the up-conversion process in a motorized BBO crystal. The time resolution is about 200 fs while the spectra resolution is 1.5 nm. All the measurements were carried out under magic-angle conditions. Solutions of compounds **A-C** in the presence of the nucleotides at ca. 5 mM were prepared in ETN buffer. To avoid photoproduct interferences, the solutions were stirred during the experiments and photodegradation was checked

by recording the absorption spectrum of the samples before and after the measurements. Transient absorption and broadband fluorescence up-conversion data were analyzed using Surface Explorer PRO (Ultrafast Systems) software, which allows performing singular value decomposition of the 3D surface into principal components (spectra and kinetics) and global analysis (giving lifetimes and Decay Associated Spectra (DAS) of the detected transients). Species Associated Spectra (SAS) were calculated by performing target analysis according to a parallel model for the free and complexed dyes by means of GloTarAn software.<sup>8</sup>

Laser flash photolysis (Edinburgh LP980) experiments were performed upon excitation at 355 nm (third harmonic of a Quanta-Ray/ INDI Nd:YAG laser, Spectra Physics) with nanosecond time-resolution (pulse width 7 ns and laser energy < 1 mJ per pulse) coupled with a PMT for signal detection. The excitation at 355 nm was the pump-pulse while a pulsed xenon lamp was used to probe the absorption properties of the produced excited states. All measurements were performed by purging the sample with pure molecular nitrogen.

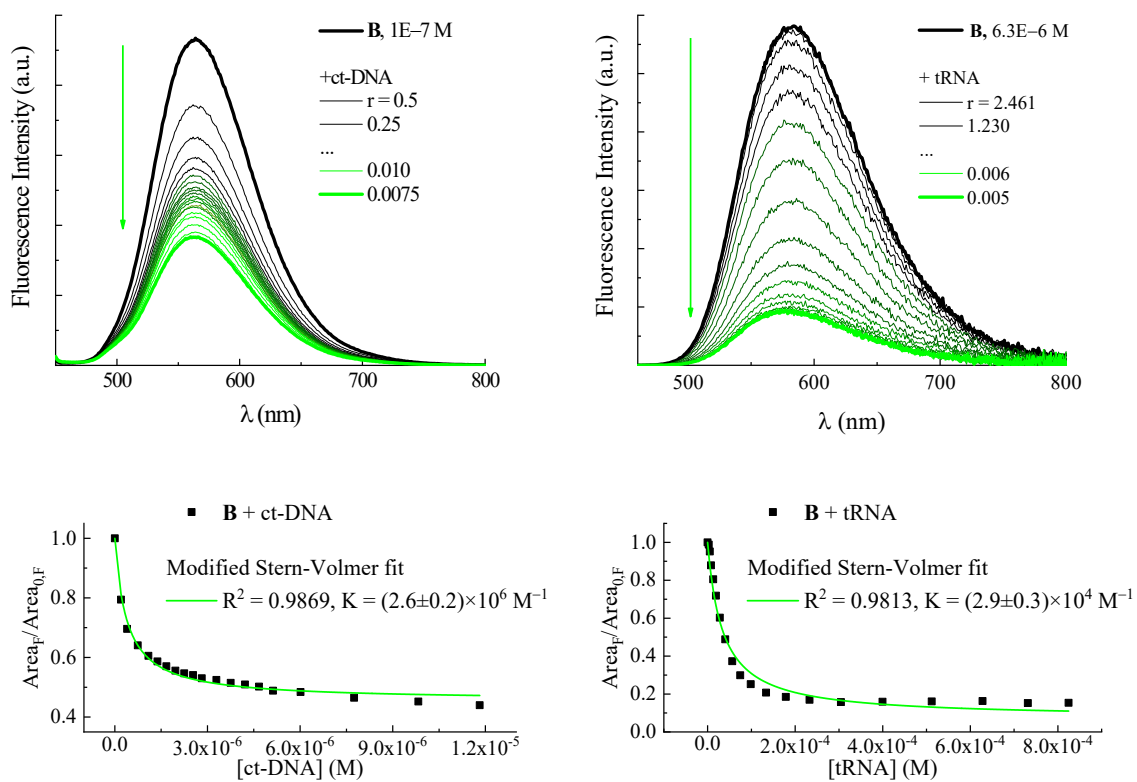

Figure S1. Upper panels: fluorimetric titrations of compound **B** with ct-DNA (left, taken from ref. 27) and t-RNA (right, taken from ref. 30).  $r$  is the ratio between drug and nucleic acid concentrations:  $r = [\mathbf{B}]/[\text{ct-DNA}]$  or  $[\mathbf{B}]/[\text{tRNA}]$ . Fluorescence intensity is corrected for the fraction of absorbed light. Green arrows show the fluorescence quenching with increasing [ct-DNA] or [tRNA]. Lower panels: fluorescence intensity of **B** as a function of ct-DNA and tRNA concentrations and its fitting according to a modified Stern-Volmer equation (eq. 1).

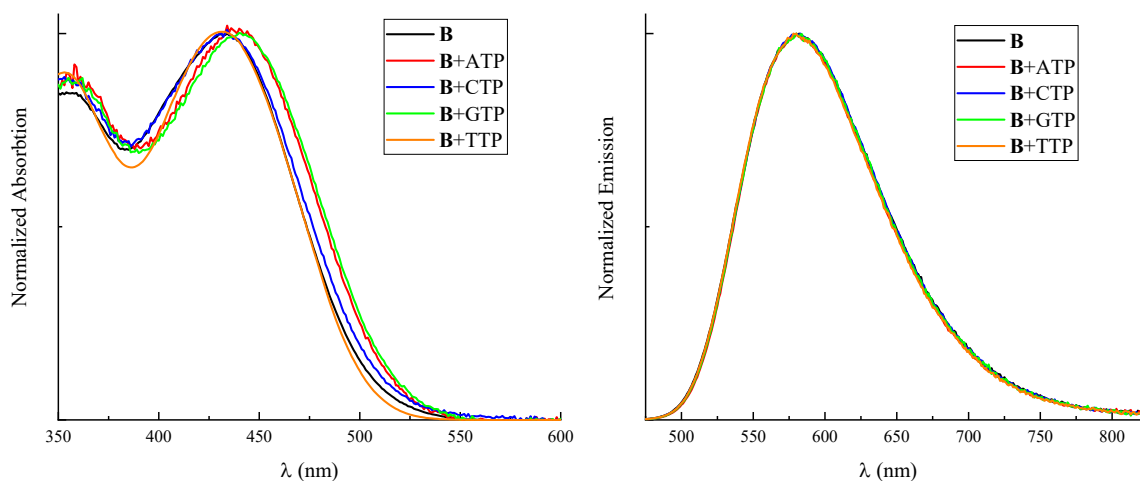

Figure S2. Normalized absorption and emission spectra for compound **B** in buffer at pH 7 alone and in the presence of nucleotides (ca. 5 mM).



Table S1. Absorption and emission maxima and Stokes shifts for compounds **A** and **B** in buffer at pH 7 alone and in the presence of nucleotides (ca. 5 mM).

|              | $\lambda_{\text{abs}}$ (nm) | $\lambda_{\text{em}}$ (nm) | $\Delta\nu$ ( $\text{cm}^{-1}$ ) |
|--------------|-----------------------------|----------------------------|----------------------------------|
| <b>A</b>     | 450                         | 604                        | 5670                             |
| <b>A+ATP</b> | 458                         | 604                        | 5280                             |
| <b>A+CTP</b> | 453                         | 604                        | 5520                             |
| <b>A+GTP</b> | 460                         | 604                        | 5180                             |
| <b>A+TTP</b> | 450                         | 604                        | 5670                             |
| <b>B</b>     | 433                         | 581                        | 5880                             |
| <b>B+ATP</b> | 439                         | 581                        | 5570                             |
| <b>B+CTP</b> | 433                         | 581                        | 5880                             |
| <b>B+GTP</b> | 441                         | 581                        | 5460                             |
| <b>B+TTP</b> | 435                         | 581                        | 5780                             |

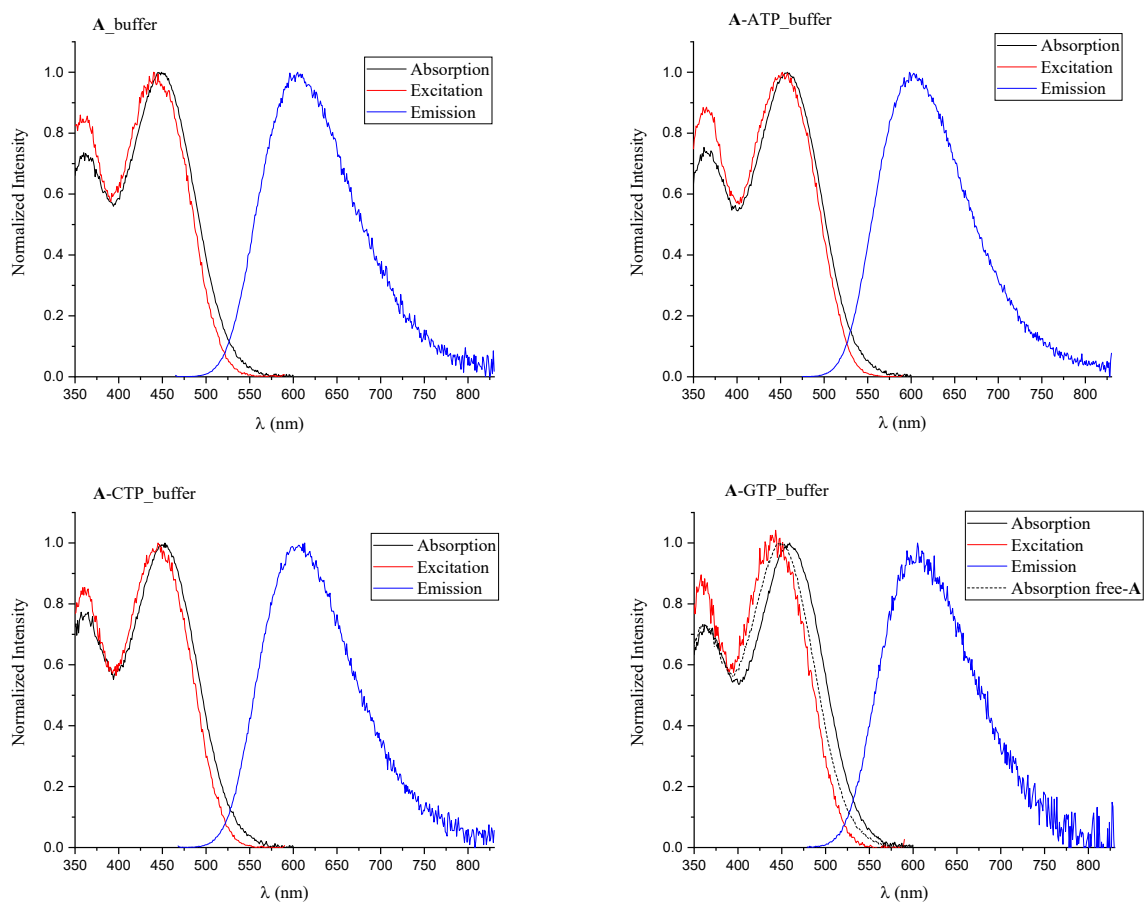

Figure S3. Normalized Absorption, Excitation and Emission spectra for compound **A**, alone and in the presence of nucleotides (ca. 5 mM).

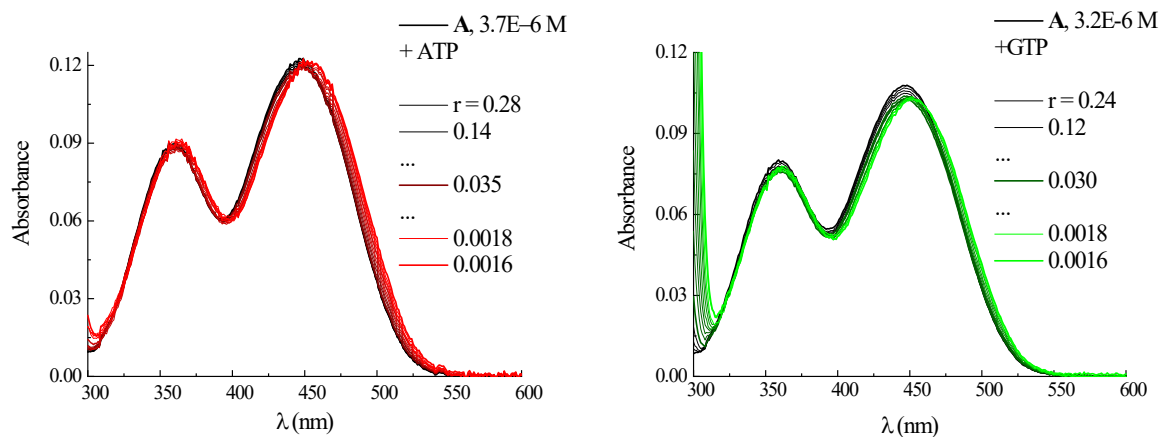

Figure S4. Spectrophotometric titrations of compound **A** with ATP (left) and GTP (right).  $r$  is the ratio between drug and nucleotide concentrations:  $r = [\mathbf{A}]/[\text{ATP}]$  or  $[\mathbf{A}]/[\text{GTP}]$ . Absorbance is corrected for dilution.

Table S2. Fluorescence quantum yields, lifetimes, and average lifetimes of compound **A** in buffer at pH 7 alone and in the presence of increasing concentrations of ATP as a function of  $r$  ( $r = [\mathbf{A}]/[\text{ATP}]$ ).

| $r = [\mathbf{A}]/[\text{ATP}]$ | $\phi_F$ | $\tau_F$ (ns)             | $\tau_{F,av}$ (ns) |
|---------------------------------|----------|---------------------------|--------------------|
|                                 | 0.180    | 1.68                      | 1.68               |
| 0.27578                         | 0.180    | 1.68                      | 1.68               |
| 0.13823                         | 0.180    | 1.69                      | 1.69               |
| 0.06946                         | 0.182    | 1.68 (98.5%); 3.12 (1.5%) | 1.70               |
| 0.03507                         | 0.186    | 1.68 (94.3%); 3.12 (5.7%) | 1.76               |
| 0.01788                         | 0.194    | 1.68 (87%); 3.12 (13%)    | 1.87               |
| 0.01127                         | 0.201    | 1.68 (81%); 3.12 (19%)    | 1.95               |
| 0.00757                         | 0.211    | 1.68 (72%); 3.12 (28%)    | 2.08               |
| 0.00527                         | 0.223    | 1.68 (65%); 3.12 (35%)    | 2.18               |
| 0.00374                         | 0.236    | 1.68 (55%); 3.12 (45%)    | 2.33               |
| 0.00298                         | 0.241    | 1.68 (50%); 3.12 (50%)    | 2.40               |
| 0.00241                         | 0.250    | 1.68 (44%); 3.12 (56%)    | 2.49               |
| 0.00206                         | 0.261    | 1.68 (40%); 3.12 (60%)    | 2.54               |
| 0.00183                         | 0.269    | 1.68 (37%); 3.12 (63%)    | 2.59               |
| 0.00160                         | 0.271    | 1.68 (34%); 3.12 (66%)    | 2.63               |

Table S3. Fluorescence quantum yields, lifetimes, and average lifetimes of compound **A** in buffer at pH 7 alone and in the presence of increasing concentrations of GTP as a function of  $r$  ( $r = [\mathbf{A}]/[\text{GTP}]$ ).

| $r = [\mathbf{A}]/[\text{GTP}]$ | $\phi_F$ | $\tau_F$ (ns)            | $\tau_{F,av}$ (ns) |
|---------------------------------|----------|--------------------------|--------------------|
|                                 | 0.180    | 1.59                     | 1.59               |
| 0.23851                         | 0.181    | 1.59                     | 1.59               |
| 0.11955                         | 0.181    | 1.59                     | 1.59               |
| 0.06007                         | 0.180    | 1.58                     | 1.58               |
| 0.03033                         | 0.177    | 1.59                     | 1.59               |
| 0.01546                         | 0.169    | 1.58                     | 1.58               |
| 0.00975                         | 0.162    | 1.57                     | 1.57               |
| 0.00654                         | 0.155    | 1.0 (1.6%); 1.6 (98.4%)  | 1.59               |
| 0.00456                         | 0.145    | 1.0 (3.3%); 1.6 (96.7%)  | 1.58               |
| 0.00324                         | 0.134    | 1.0 (4.8%); 1.6 (95.2%)  | 1.57               |
| 0.00258                         | 0.125    | 1.0 (5.6%); 1.6 (94.4%)  | 1.57               |
| 0.00208                         | 0.118    | 1.0 (8.1%); 1.6 (91.9%)  | 1.57               |
| 0.00178                         | 0.110    | 1.0 (9.6%); 1.6 (90.4%)  | 1.54               |
| 0.00159                         | 0.108    | 1.0 (10.3%); 1.6 (89.7%) | 1.54               |

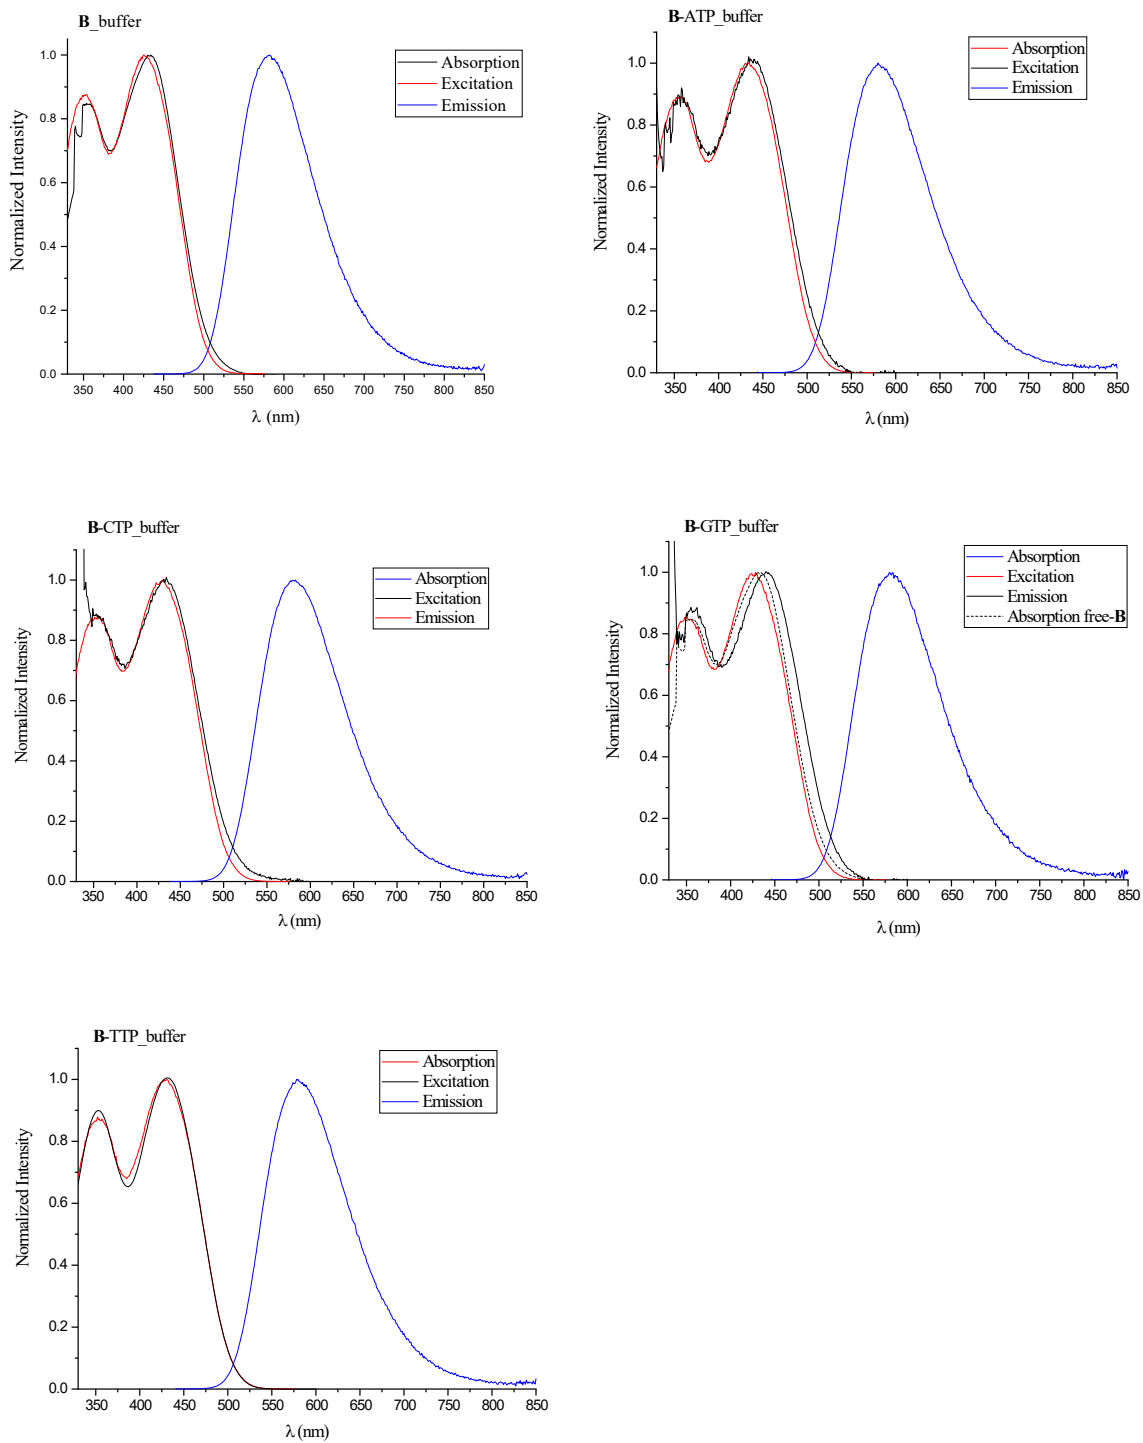

Figure S5. Normalized Absorption, Excitation and Emission spectra for compound **B**, alone and in the presence of nucleotides (ca. 5 mM).

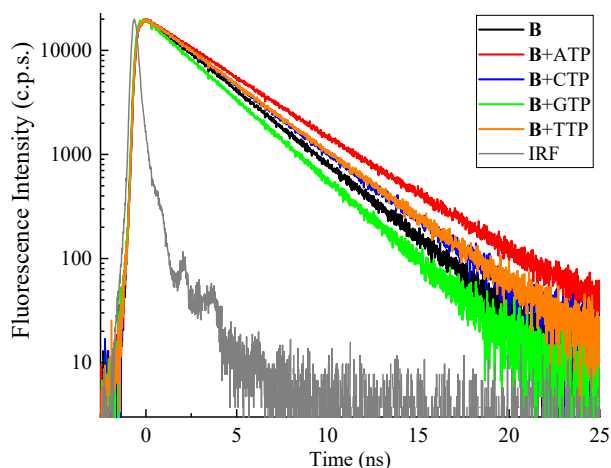

Figure S6. Fluorescence decay kinetics recorded by TC-SPC ( $\lambda_{\text{exc}} = 450 \text{ nm}$ ) for compound **B** in buffer at pH 7 alone and in the presence of nucleotides (ca. 5mM) together with the Instrumental Response Function (IRF).

Table S4. Fluorescence quantum yields and lifetimes for compound **B** in buffer at pH 7 alone and in the presence of nucleotides (ca. 5mM).

|              | $\phi_F$ | $\phi_F$ (%) | $\tau_F$ (ns)          |
|--------------|----------|--------------|------------------------|
| <b>B</b>     | 0.43     | 43%          | 2.98                   |
| <b>B+ATP</b> | 0.44     | 44%          | 3.71                   |
| <b>B+CTP</b> | 0.41     | 41%          | 3.22                   |
| <b>B+GTP</b> | 0.17     | 17%          | 0.45(3%) and 2.73(97%) |
| <b>B+TTP</b> | 0.41     | 41%          | 3.26                   |

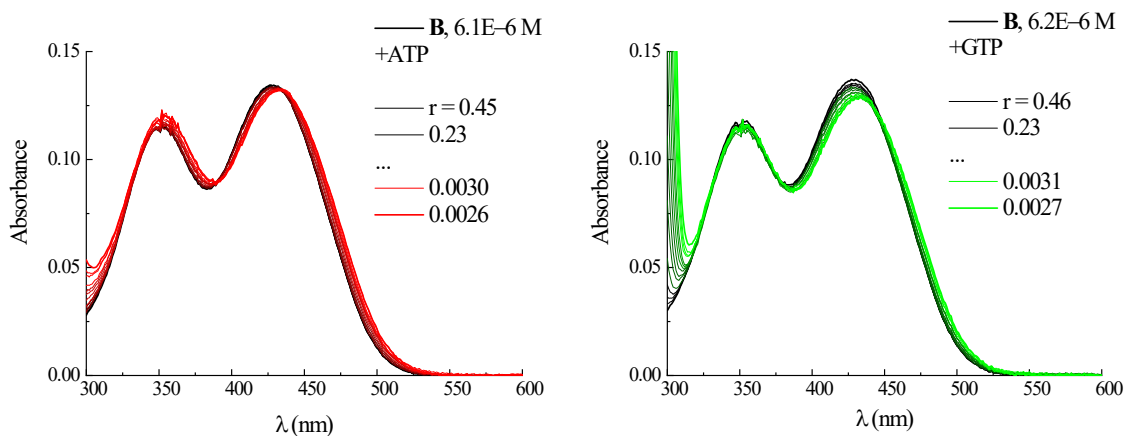

Figure S7. Spectrophotometric titrations of compound **B** with ATP (left) and GTP (right).  $r$  is the ratio between drug and nucleotide concentrations:  $r = [B]/[ATP]$  or  $[GTP]$ . Absorbance is corrected for dilution.

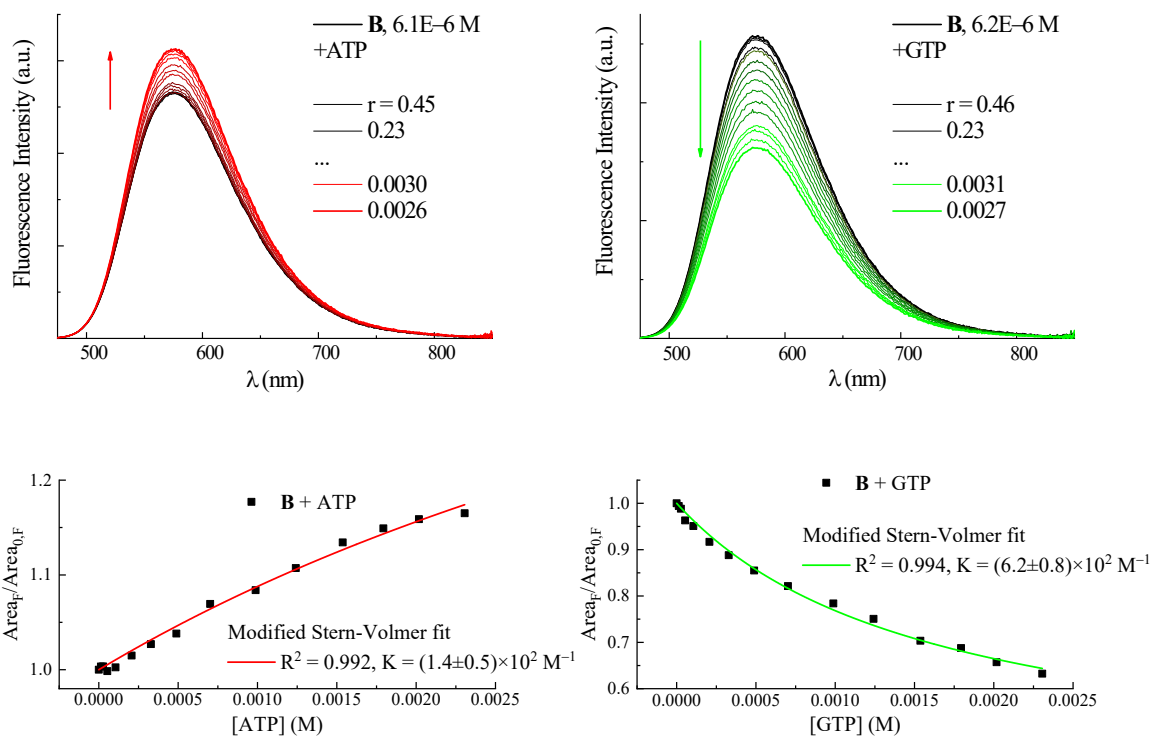

Figure S8. Upper panels: fluorimetric titrations of compound **B** with ATP (left) and GTP (right).  $r$  is the ratio between drug and nucleotide concentrations:  $r = [\mathbf{B}]/[\text{ATP}]$  or  $[\text{GTP}]$ . Fluorescence intensity is corrected for the fraction of absorbed light. Arrows indicate the trend of the fluorescence intensity with decreasing  $r$ : the red arrow shows the fluorescence enhancement due to increasing  $[\text{ATP}]$ ; the green arrow shows the fluorescence quenching with increasing  $[\text{GTP}]$ . Lower panels: fluorescence intensity of **B** as a function of ATP and GTP concentrations and its fitting according to a modified Stern-Volmer equation (eq. 1).

Table S5. Fluorescence quantum yields and lifetimes of compound **B** in buffer at pH 7 alone and in the presence of increasing concentrations of ATP as a function of  $r$  ( $r = [\mathbf{B}]/[\text{ATP}]$ ).

| $r = [\mathbf{B}]/[\text{ATP}]$ | $\phi_F$ | $\tau_F$ (ns) |
|---------------------------------|----------|---------------|
| --                              | 0.430    | 2.98          |
| 0.45467                         | 0.431    | 2.99          |
| 0.22790                         | 0.432    | 2.98          |
| 0.11452                         | 0.429    | 3.00          |
| 0.05783                         | 0.431    | 3.03          |
| 0.02948                         | 0.436    | 3.09          |
| 0.01858                         | 0.442    | 3.15          |
| 0.01247                         | 0.446    | 3.22          |
| 0.00869                         | 0.460    | 3.30          |
| 0.00617                         | 0.466    | 3.40          |
| 0.00491                         | 0.476    | 3.46          |
| 0.00397                         | 0.488    | 3.53          |
| 0.00340                         | 0.494    | 3.57          |
| 0.00302                         | 0.498    | 3.60          |
| 0.00265                         | 0.501    | 3.65          |

Table S6. Fluorescence quantum yields and lifetimes of compound **B** in buffer at pH 7 alone and in the presence of increasing concentrations of GTP as a function of  $r$  ( $r = [\mathbf{B}]/[\text{GTP}]$ ).

| $r = [\mathbf{B}]/[\text{GTP}]$ | $\phi_F$ | $\tau_F$ (ns) |
|---------------------------------|----------|---------------|
| --                              | 0.430    | 2.89          |
| 0.46212                         | 0.428    | 2.88          |
| 0.23164                         | 0.425    | 2.86          |
| 0.11639                         | 0.414    | 2.85          |
| 0.05877                         | 0.409    | 2.85          |
| 0.02996                         | 0.394    | 2.86          |
| 0.01888                         | 0.382    | 2.83          |
| 0.01268                         | 0.368    | 2.82          |
| 0.00884                         | 0.353    | 2.80          |
| 0.00627                         | 0.337    | 2.78          |
| 0.00499                         | 0.323    | 2.76          |
| 0.00403                         | 0.303    | 2.74          |
| 0.00346                         | 0.296    | 2.72          |
| 0.00307                         | 0.283    | 2.71          |
| 0.00269                         | 0.272    | 2.70          |

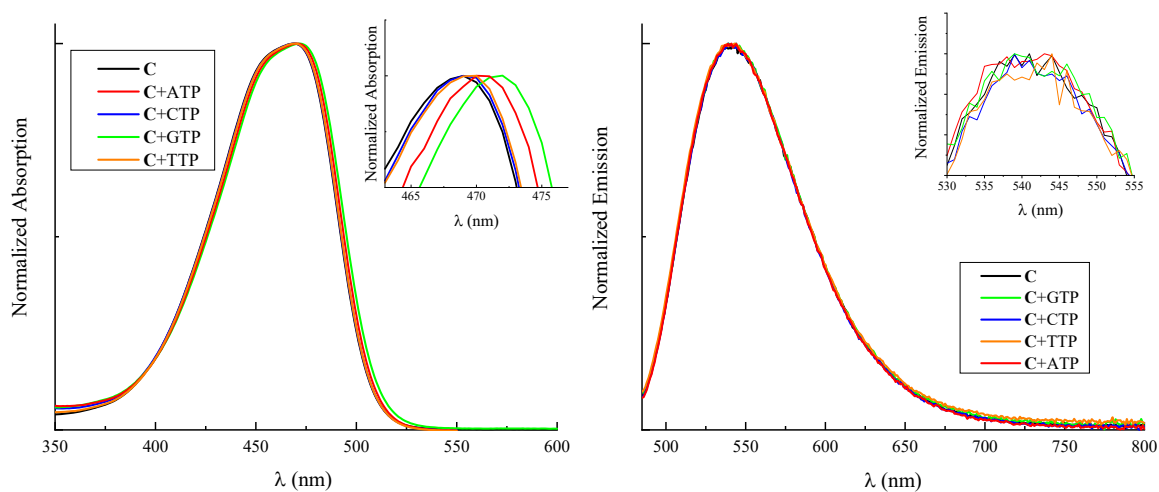

Figure S9. Normalized absorption and emission spectra for compound **C** in buffer at pH 7 alone and in the presence of nucleotides (ca. 5 mM).

Table S7. Absorption and emission maxima and Stokes shifts for compound **C** in buffer at pH 7 alone and in the presence of nucleotides (ca. 5 mM).

|              | $\lambda_{\text{abs}}$ (nm) | $\lambda_{\text{em}}$ (nm) | $\Delta\nu$ ( $\text{cm}^{-1}$ ) |
|--------------|-----------------------------|----------------------------|----------------------------------|
| <b>C</b>     | 469                         | 542                        | 2872                             |
| <b>C+ATP</b> | 470                         | 541                        | 2792                             |
| <b>C+CTP</b> | 469                         | 541                        | 2838                             |
| <b>C+GTP</b> | 472                         | 541                        | 2702                             |
| <b>C+TTP</b> | 469                         | 542                        | 2872                             |

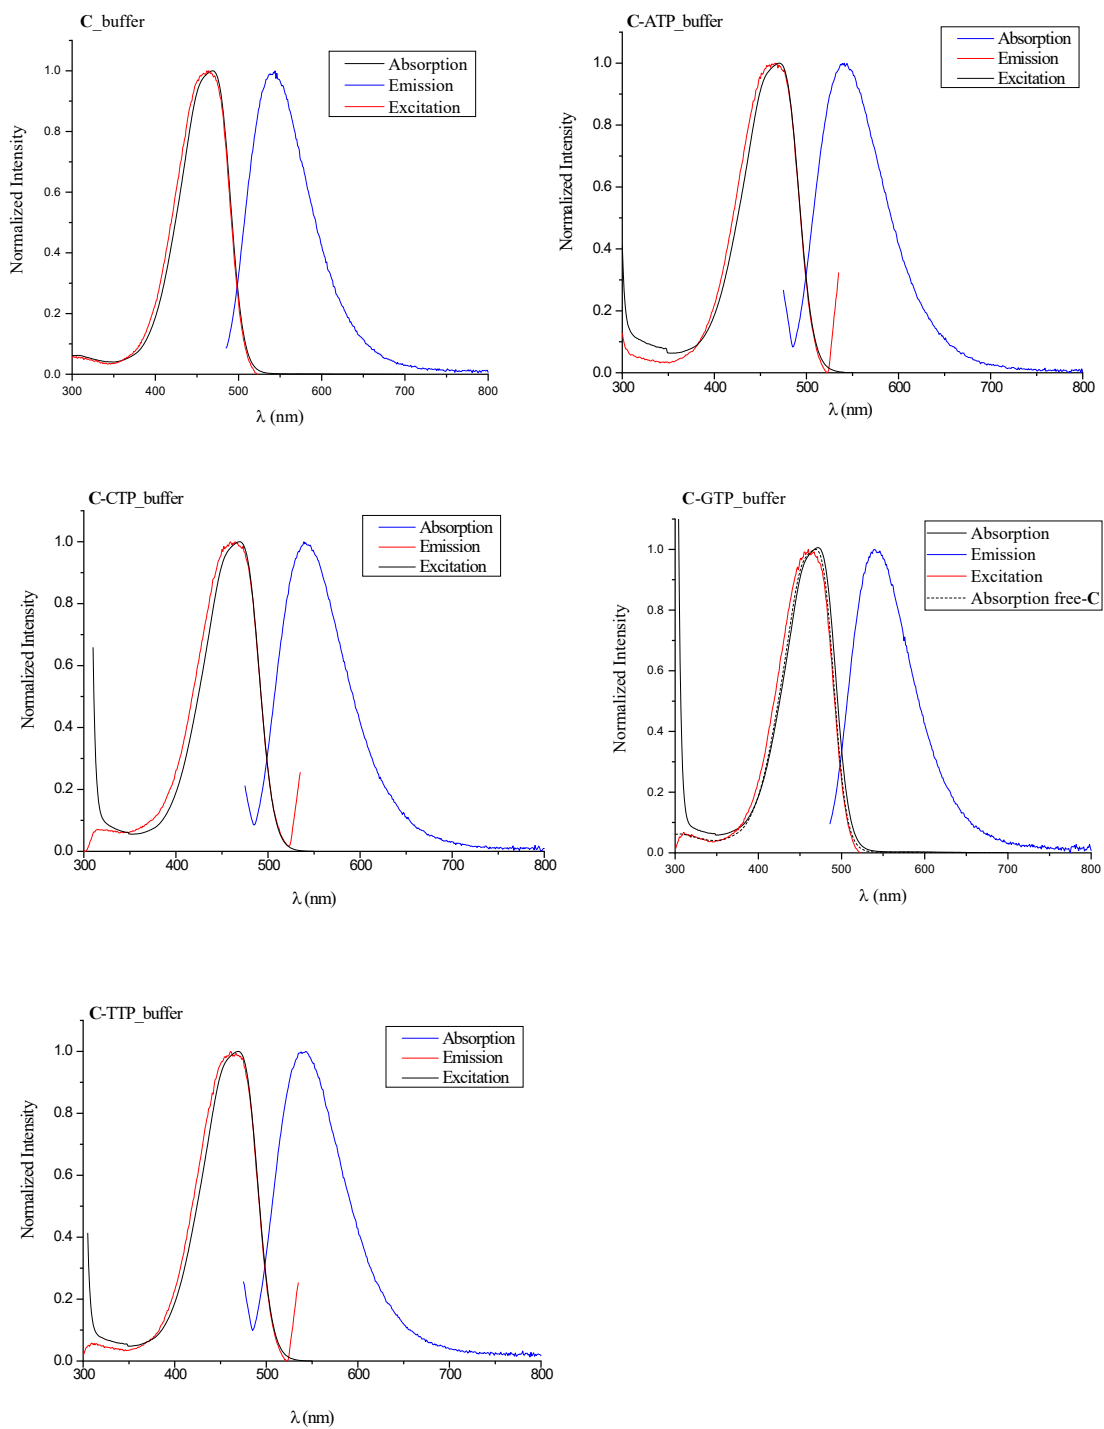

Figure S10. Normalized Absorption, Excitation and Emission spectra for compound C, alone and in the presence of nucleotides (ca. 5 mM).

Table S8. Fluorescence quantum yields and lifetimes for compound **C** in buffer at pH 7 alone and in the presence of nucleotides (ca. 5 mM). Lifetimes were obtained from Fluorescence Up Conversion measurements.

|              | $\phi_F$ | $\tau_F$ (ps)        |
|--------------|----------|----------------------|
| <b>C</b>     | 0.0065   | 24                   |
| <b>C+ATP</b> | 0.0072   | 28                   |
| <b>C+CTP</b> | 0.0068   | 22                   |
| <b>C+GTP</b> | 0.0046   | 3.4(28%) and 25(72%) |
| <b>C+TTP</b> | 0.0072   | 21                   |

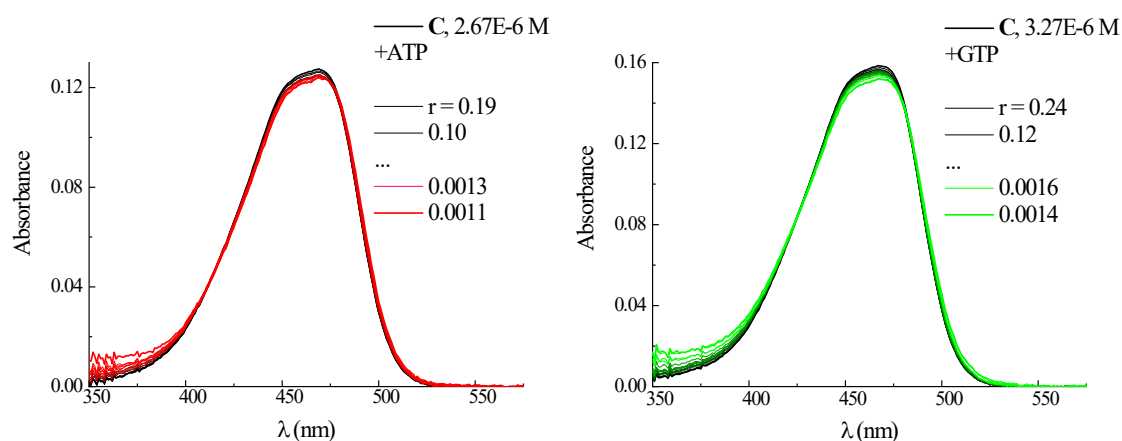

Figure S11. Spectrophotometric titrations of compound **C** with ATP (left) and GTP (right).  $r$  is the ratio between drug and nucleotide concentrations:  $r=[C]/[ATP]$  or  $[GTP]$ . Absorbance is corrected for dilution.

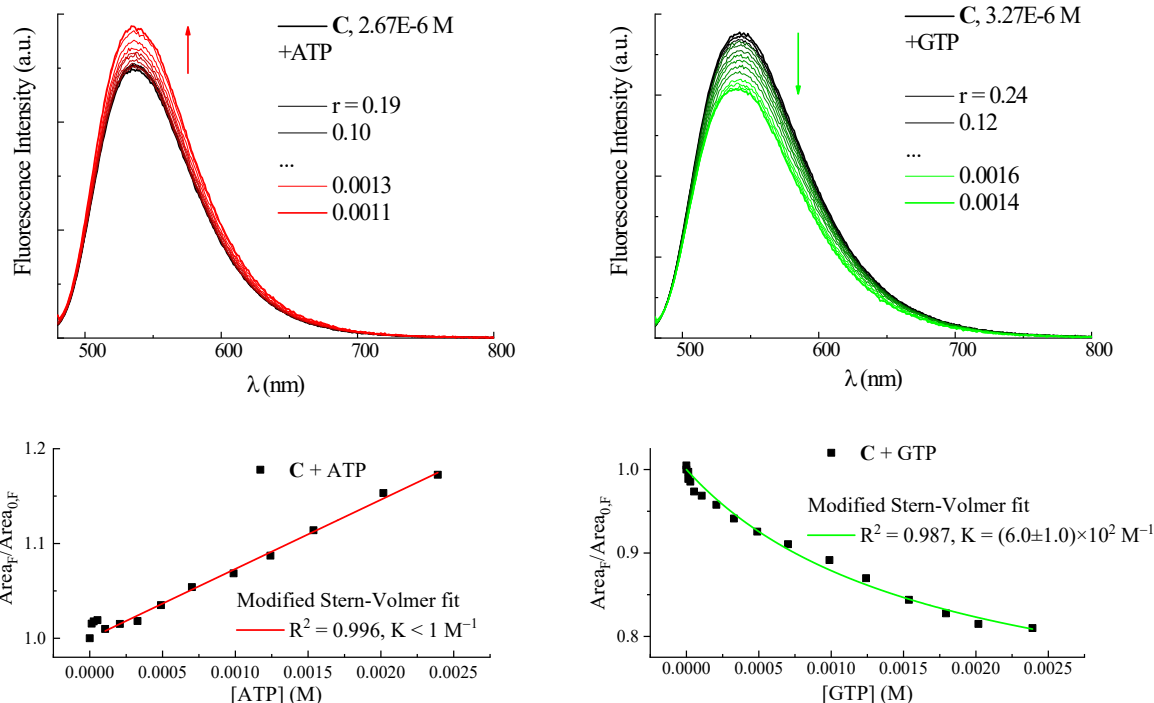

Figure S12. Upper panels: fluorimetric titrations of compound **C** with ATP (left) and GTP (right).  $r$  is the ratio between drug and nucleotide concentrations:  $r=[C]/[ATP]$  or  $[GTP]$ . Fluorescence intensity is corrected for the fraction of absorbed light. Arrows indicate the trend of the fluorescence intensity with decreasing  $r$ : the red arrow shows the fluorescence enhancement due to increasing  $[ATP]$ ; the green arrow shows the fluorescence quenching with increasing  $[GTP]$ . Lower panels: fluorescence intensity of **C** as a function of ATP and GTP concentrations and its fitting according to a modified Stern-Volmer equation (eq. 1).



Table S9. Fluorescence quantum yields of compound **C** in buffer at pH 7 alone and in the presence of increasing concentrations of ATP (left) or GTP (right) as a function of  $r$  ( $r = [C]/[ATP]$  or  $[GTP]$ ).

| $r = [C]/[ATP]$ | $\phi_F$ |
|-----------------|----------|
| --              | 0.0065   |
| 0.19901         | 0.0066   |
| 0.09975         | 0.00662  |
| 0.05012         | 0.00662  |
| 0.02531         | 0.00656  |
| 0.0129          | 0.0066   |
| 0.00813         | 0.00662  |
| 0.00546         | 0.00673  |
| 0.0038          | 0.00685  |
| 0.0027          | 0.00695  |
| 0.00215         | 0.00707  |
| 0.00174         | 0.00724  |
| 0.00132         | 0.0075   |
| 0.00112         | 0.00762  |

| $r = [C]/[GTP]$ | $\phi_F$ |
|-----------------|----------|
| --              | 0.0065   |
| 0.24373         | 0.00648  |
| 0.12217         | 0.00641  |
| 0.06139         | 0.00633  |
| 0.031           | 0.0063   |
| 0.0158          | 0.00623  |
| 0.00996         | 0.00612  |
| 0.00669         | 0.00602  |
| 0.00466         | 0.00592  |
| 0.00331         | 0.00579  |
| 0.00263         | 0.00565  |
| 0.00213         | 0.00549  |
| 0.00182         | 0.00538  |
| 0.00162         | 0.0053   |
| 0.00137         | 0.00526  |

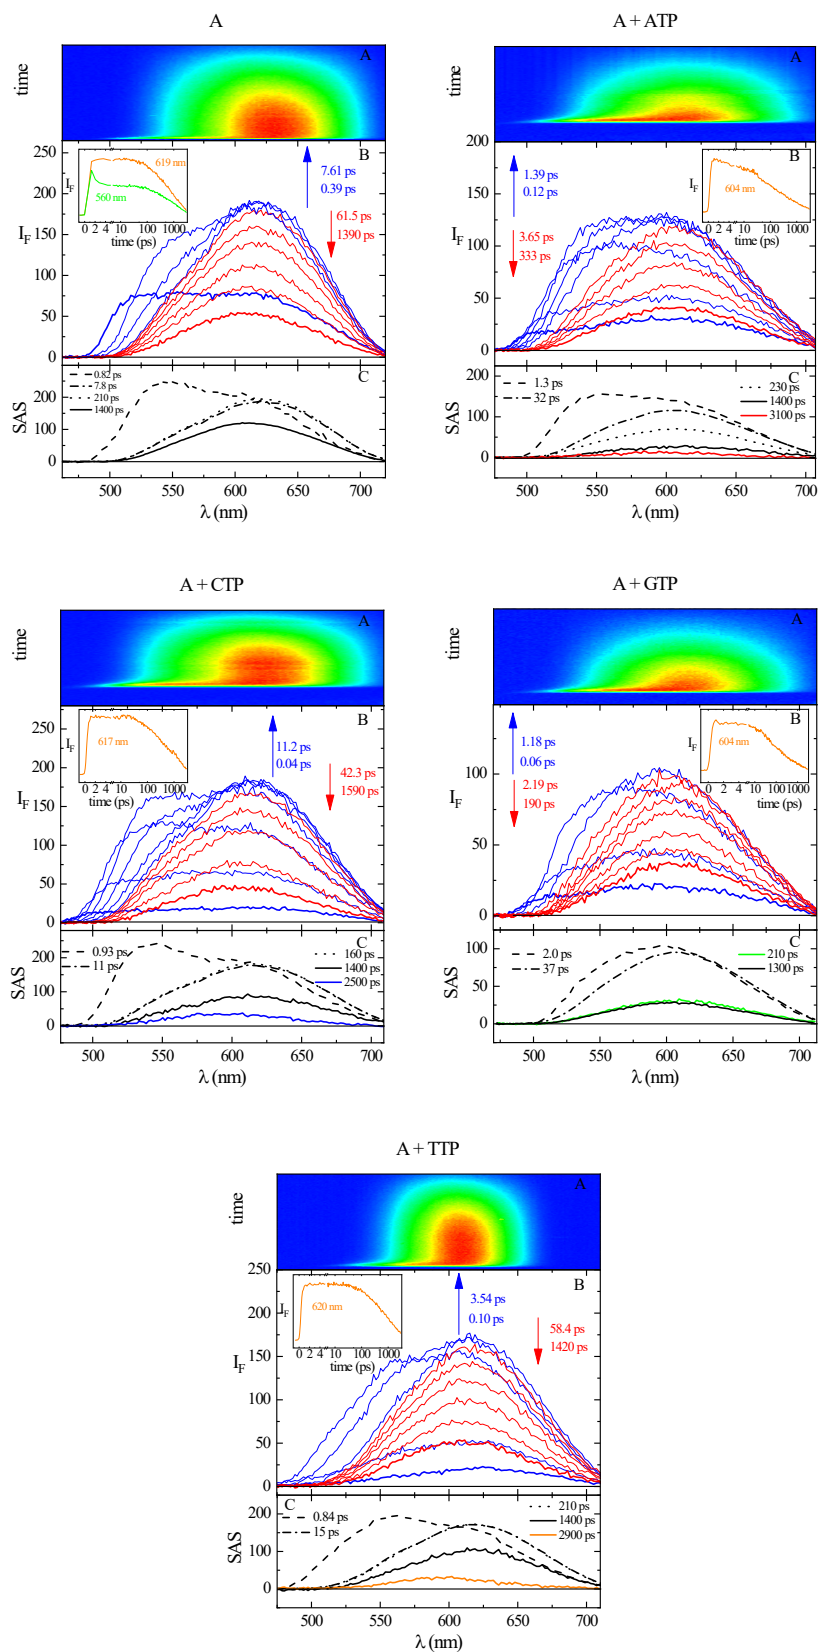

Figure S13. Femtosecond fluorescence up conversion measurements for compound A in buffer at pH 7 alone and in the presence of nucleotides (ca. 5 mM) with  $\lambda_{\text{pump}} = 400$  nm. Panel A: experimental 3D matrix; Panel B: representative spectra at different delay times and representative kinetics (inset) at different wavelengths; Panel C: Species Associated Spectra (SAS) obtained by Target Analysis.

Table S10. Results of Target Analysis of the femtosecond fluorescence up conversion data for compound **A** in buffer at pH 7 alone and in the presence of nucleotides (ca. 5 mM) with  $\lambda_{\text{pump}} = 400 \text{ nm}$ .

| Compound | Nucleotide | $\tau_{\text{FUC}} \text{ (ps)}$ | $\lambda_{\text{F}}^{\text{max}} \text{ (nm)}$ |
|----------|------------|----------------------------------|------------------------------------------------|
| <b>A</b> | -          | 0.82                             | 547, 611 <sup>sp</sup>                         |
|          |            | 7.8                              | 621                                            |
|          |            | 210                              | 621                                            |
|          |            | 1400                             | 611                                            |
|          | ATP        | 1.3                              | 555, 605 <sup>sp</sup>                         |
|          |            | 32                               | 607                                            |
|          |            | 230                              | 610                                            |
|          |            | 1400                             | 607                                            |
|          |            | 3100                             | 600                                            |
|          | CTP        | 0.93                             | 545, 600 <sup>sp</sup>                         |
|          |            | 11                               | 615                                            |
|          |            | 160                              | 615                                            |
|          |            | 1400                             | 607                                            |
|          |            | 2500                             | 602                                            |
|          | GTP        | 2.0                              | 598                                            |
|          |            | 37                               | 608                                            |
|          |            | 210                              | 608                                            |
|          |            | 1300                             | 606                                            |
|          | TTP        | 0.84                             | 562, 602 <sup>sp</sup>                         |
|          |            | 15                               | 620                                            |
| 210      |            | 620                              |                                                |
| 1400     |            | 613                              |                                                |
| 2900     |            | 600                              |                                                |

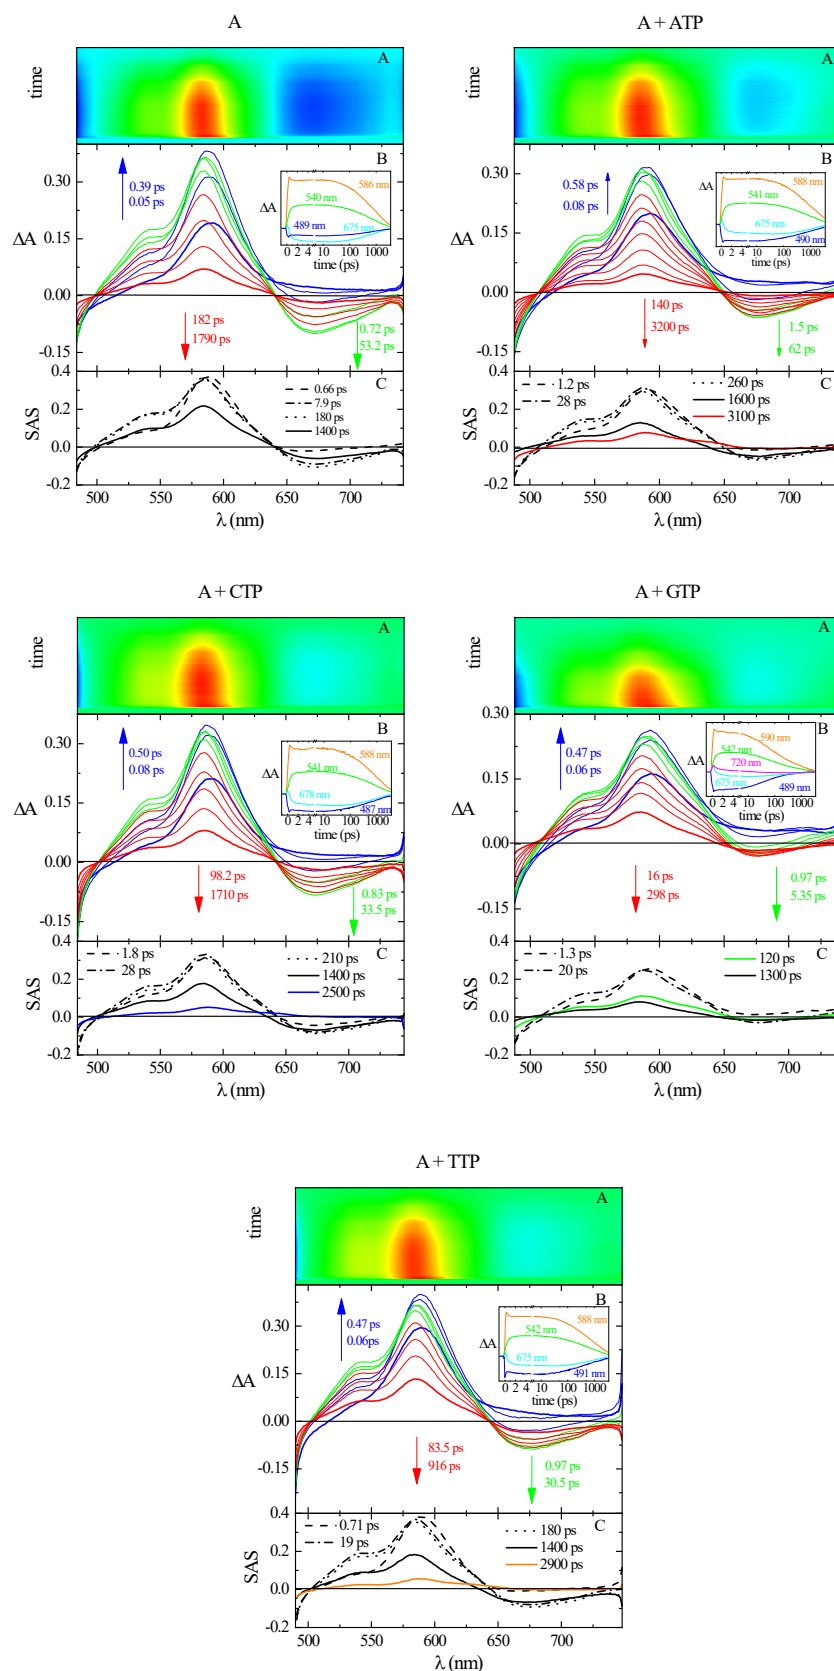

Figure S14. Femtosecond transient absorption measurements for compound A in buffer at pH 7 alone and in the presence of nucleotides (ca. 5 mM) with  $\lambda_{\text{pump}} = 400$  nm. Panel A: experimental 3D matrix; Panel B: representative spectra at different delay times and representative kinetics (inset) at different wavelengths; Panel C: Species Associated Spectra (SAS) obtained by Target Analysis.

Table S11. Results of Target Analysis of the femtosecond fluorescence up conversion and transient absorption data for compound **A** in buffer at pH 7 alone and in the presence of nucleotides (ca. 5 mM) with  $\lambda_{\text{pump}} = 400$  nm and relative assignments.

| Compound | Nucleotide | $\tau_{\text{FUC}}$ (ps) | $\tau_{\text{TA}}$ (ps) | Assignment            |
|----------|------------|--------------------------|-------------------------|-----------------------|
| <b>A</b> | -          | 0.82                     | 0.66                    | Solvation/ $S_{1,LE}$ |
|          |            | 7.8                      | 7.9                     | Vibrational Cooling   |
|          |            | 210                      | 180                     | Structural Relaxation |
|          |            | 1400                     | 1400                    | $S_{1,ICT}$           |
|          | ATP        | 1.3                      | 1.2                     | Solvation/ $S_{1,LE}$ |
|          |            | 32                       | 28                      | Vibrational Cooling   |
|          |            | 230                      | 260                     | Structural Relaxation |
|          |            | 1400                     | 1600                    | $S_{1,ICT}$           |
|          |            | 3100                     | 3100                    | $S_1$ complex         |
|          | CTP        | 0.93                     | 1.8                     | Solvation/ $S_{1,LE}$ |
|          |            | 11                       | 28                      | Vibrational Cooling   |
|          |            | 160                      | 210                     | Structural Relaxation |
|          |            | 1400                     | 1400                    | $S_{1,ICT}$           |
|          |            | 2500                     | 2500                    | $S_1$ complex         |
|          | GTP        | 2.0                      | 1.3                     | Solvation/ $S_{1,LE}$ |
|          |            | 37                       | 20                      | Vibrational Cooling   |
|          |            | 210                      | 120                     | $S_1$ complex         |
|          | TTP        | 1300                     | 1300                    | $S_{1,ICT}$           |
|          |            | 0.84                     | 0.71                    | Solvation/ $S_{1,LE}$ |
|          |            | 15                       | 19                      | Vibrational Cooling   |
| 210      |            | 280                      | Structural Relaxation   |                       |
|          | 1400       | 1400                     | $S_{1,ICT}$             |                       |
|          | 2900       | 2900                     | $S_1$ complex           |                       |

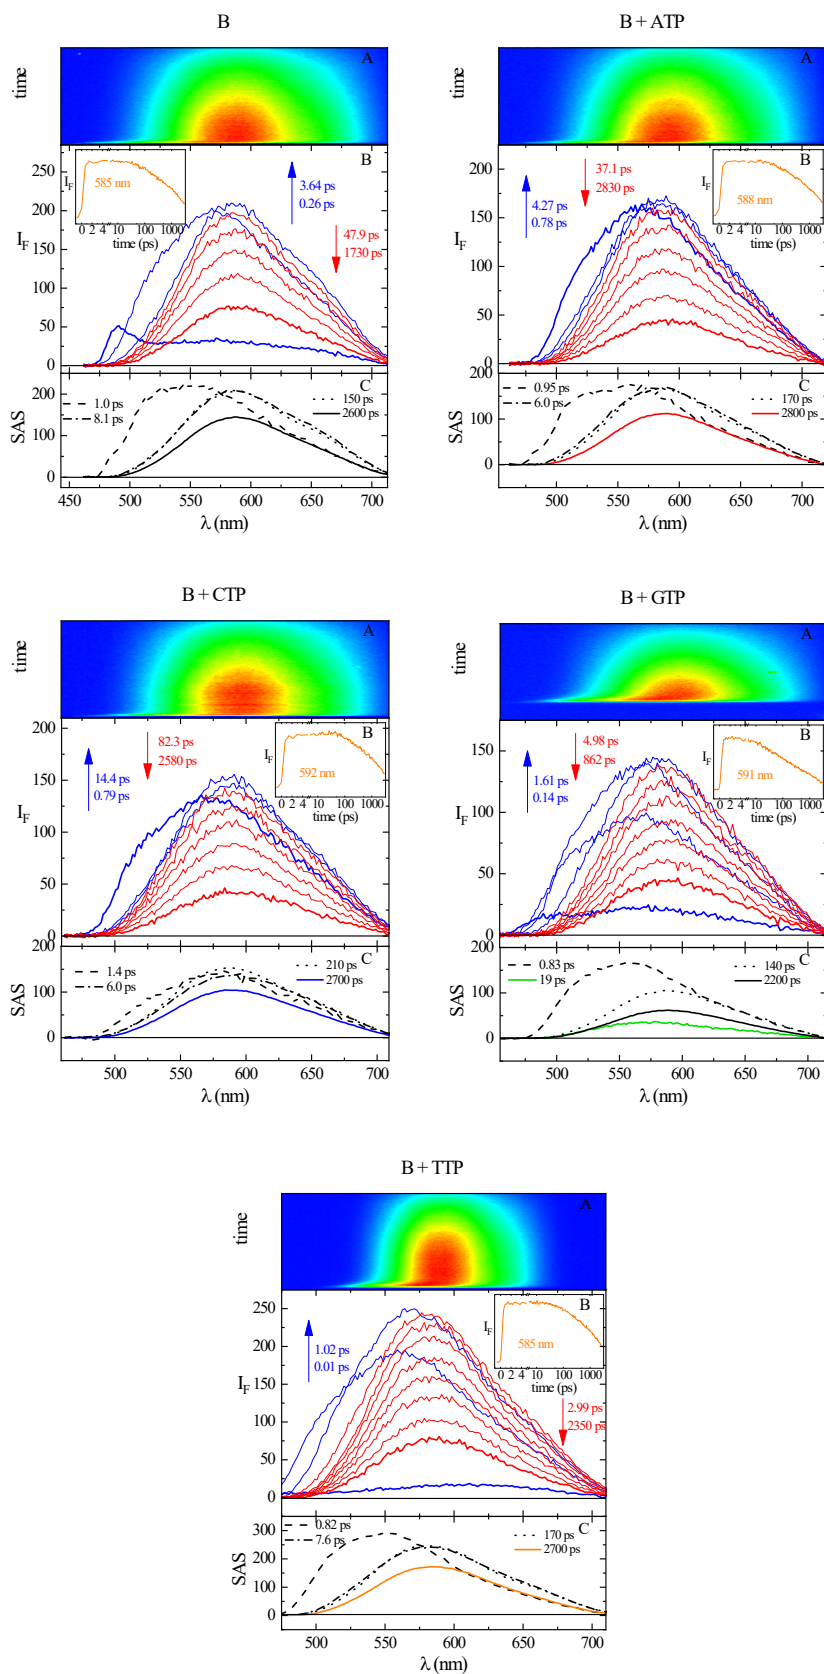

Figure S15. Femtosecond fluorescence up conversion measurements for compound **B** in buffer at pH 7 alone and in the presence of nucleotides (ca. 5 mM) with  $\lambda_{\text{pump}} = 400$  nm. Panel A: experimental 3D matrix; Panel B: representative spectra at different delay times and representative kinetics (inset) at different wavelengths; Panel C: Species Associated Spectra (SAS) obtained by Target Analysis.

Table S12. Results of Target Analysis of the femtosecond fluorescence up conversion data for compound **B** in buffer at pH 7 alone and in the presence of nucleotides (ca. 5 mM) with  $\lambda_{\text{pump}} = 400 \text{ nm}$ .

| Compound | Nucleotide | $\tau_{\text{FUC}}$ (ps) | $\lambda_{\text{F}}^{\text{max}}$ (nm) |
|----------|------------|--------------------------|----------------------------------------|
| <b>B</b> | -          | 1.0                      | 545                                    |
|          |            | 8.1                      | 587, 632 <sup>SP</sup>                 |
|          |            | 150                      | 587, 643 <sup>SP</sup>                 |
|          |            | 2600                     | 589                                    |
|          | ATP        | 0.95                     | 555                                    |
|          |            | 6.0                      | 586                                    |
|          |            | 170                      | 586, 646 <sup>SP</sup>                 |
|          |            | 2800                     | 591                                    |
|          | CTP        | 1.4                      | 584                                    |
|          |            | 6.0                      | 591                                    |
|          |            | 210                      | 587, 636 <sup>SP</sup>                 |
|          |            | 2700                     | 591                                    |
|          | GTP        | 0.83                     | 557                                    |
|          |            | 19                       | 587                                    |
|          |            | 140                      | 587                                    |
|          |            | 2200                     | 591                                    |
|          | TTP        | 0.82                     | 547                                    |
|          |            | 7.6                      | 582                                    |
|          |            | 170                      | 582, 643 <sup>SP</sup>                 |
| 2700     |            | 587                      |                                        |

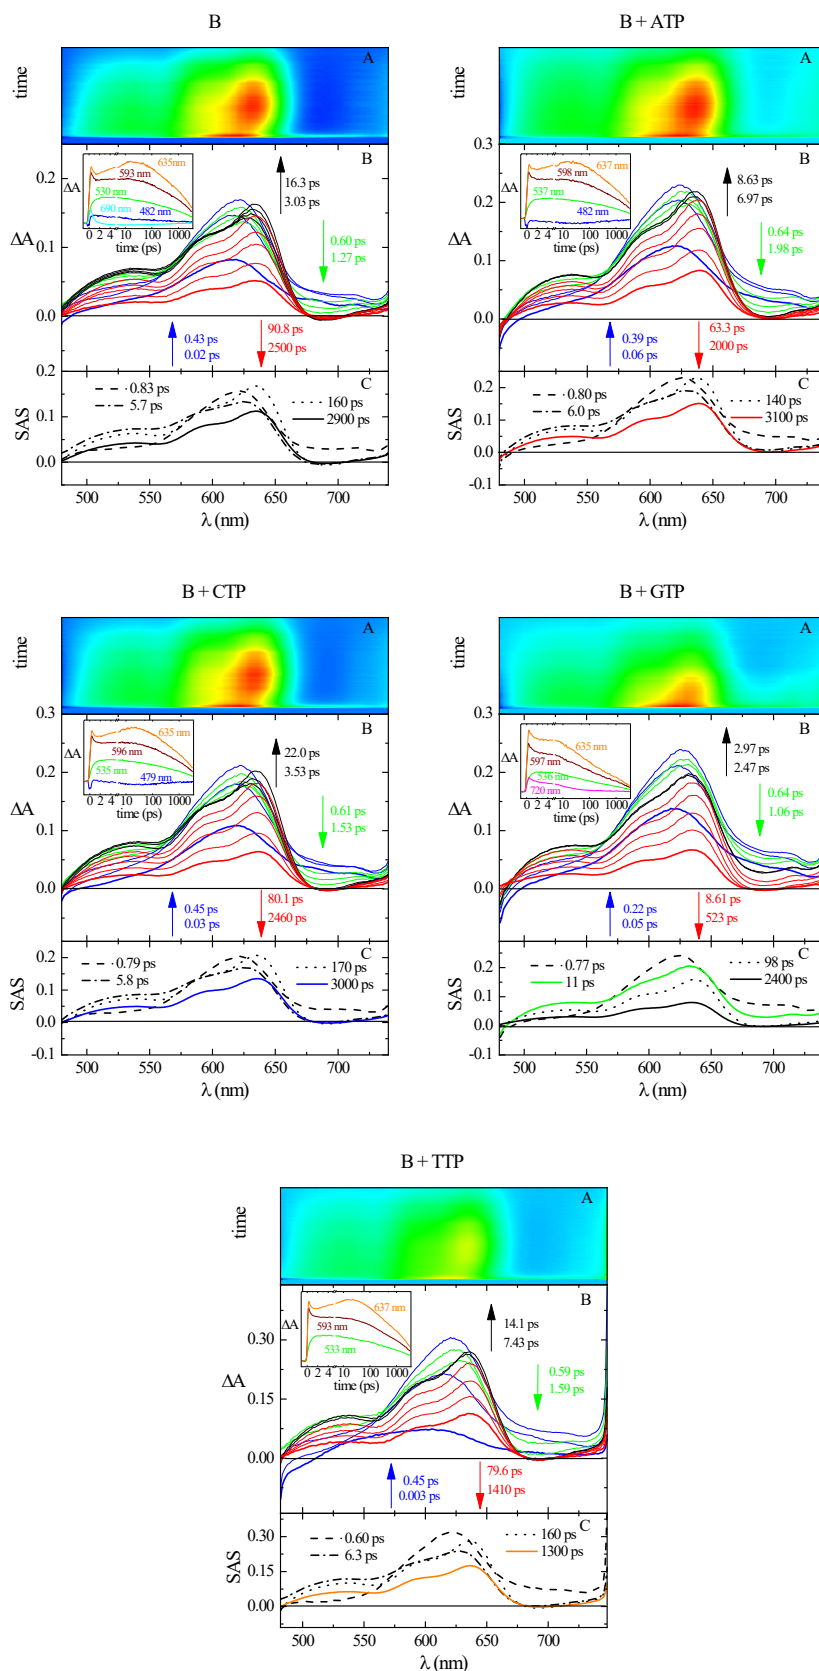

Figure S16. Femtosecond transient absorption measurements for compound **B** in buffer at pH 7 alone and in the presence of nucleotides (ca. 5 mM) with  $\lambda_{\text{pump}} = 400$  nm. Panel A: experimental 3D matrix; Panel B: representative spectra at different delay times and representative kinetics (inset) at different wavelengths; Panel C: Species Associated Spectra (SAS) obtained by Target Analysis.



Table S13. Results of Target Analysis of the femtosecond fluorescence up conversion and transient absorption data for compound **B** in buffer at pH 7 alone and in the presence of nucleotides (ca. 5 mM) with  $\lambda_{\text{pump}} = 400$  nm and relative assignments.

| Compound | Nucleotide | $\tau_{\text{FUC}}$ (ps) | $\tau_{\text{TA}}$ (ps)    | Assignment                 |
|----------|------------|--------------------------|----------------------------|----------------------------|
| <b>B</b> | -          | 1.0                      | 0.83                       | Solvation/ $S_{1,LE}$      |
|          |            | 8.1                      | 5.7                        | Vibrational Cooling        |
|          |            | 150                      | 160                        | Structural Relaxation      |
|          |            | 2600                     | 2900                       | $S_{1,ICT}$                |
|          | ATP        | 0.95                     | 0.80                       | Solvation/ $S_{1,LE}$      |
|          |            | 6.0                      | 6.0                        | Vibrational Cooling        |
|          |            | 170                      | 140                        | Structural Relaxation      |
|          |            | 2800                     | 3100                       | $S_{1,ICT}/\text{complex}$ |
|          | CTP        | 1.4                      | 0.79                       | Solvation/ $S_{1,LE}$      |
|          |            | 6.0                      | 5.8                        | Vibrational Cooling        |
|          |            | 210                      | 170                        | Structural Relaxation      |
|          |            | 2700                     | 3000                       | $S_{1,ICT}/\text{complex}$ |
|          | GTP        | 0.83                     | 0.77                       | Solvation/ $S_{1,LE}$      |
|          |            | 19                       | 11                         | $S_1$ complex              |
|          |            | 140                      | 98                         | Structural Relaxation      |
|          |            | 2200                     | 2400                       | $S_{1,ICT}$                |
| TTP      | 0.82       | 0.60                     | Solvation/ $S_{1,LE}$      |                            |
|          | 7.6        | 6.3                      | Vibrational Cooling        |                            |
|          | 170        | 160                      | Structural Relaxation      |                            |
|          | 2700       | 3000                     | $S_{1,ICT}/\text{complex}$ |                            |

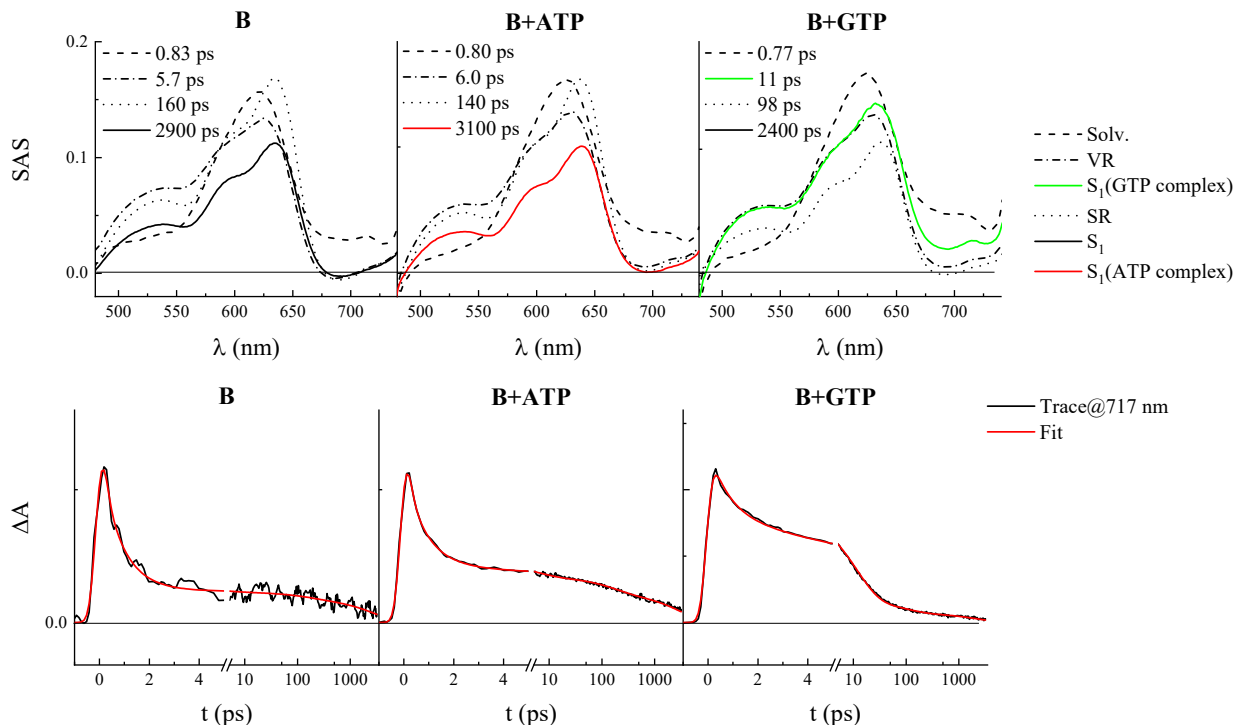

Figure S17. Species Associated Spectra (SAS) obtained by Target Analysis of the femtosecond transient absorption data (upper graphs) and associated kinetics recorded at 717 nm (lower graphs) for compound **B** in buffer at pH 7 alone (left), and in the presence of ca. 5 mM ATP (central) or GTP (right).

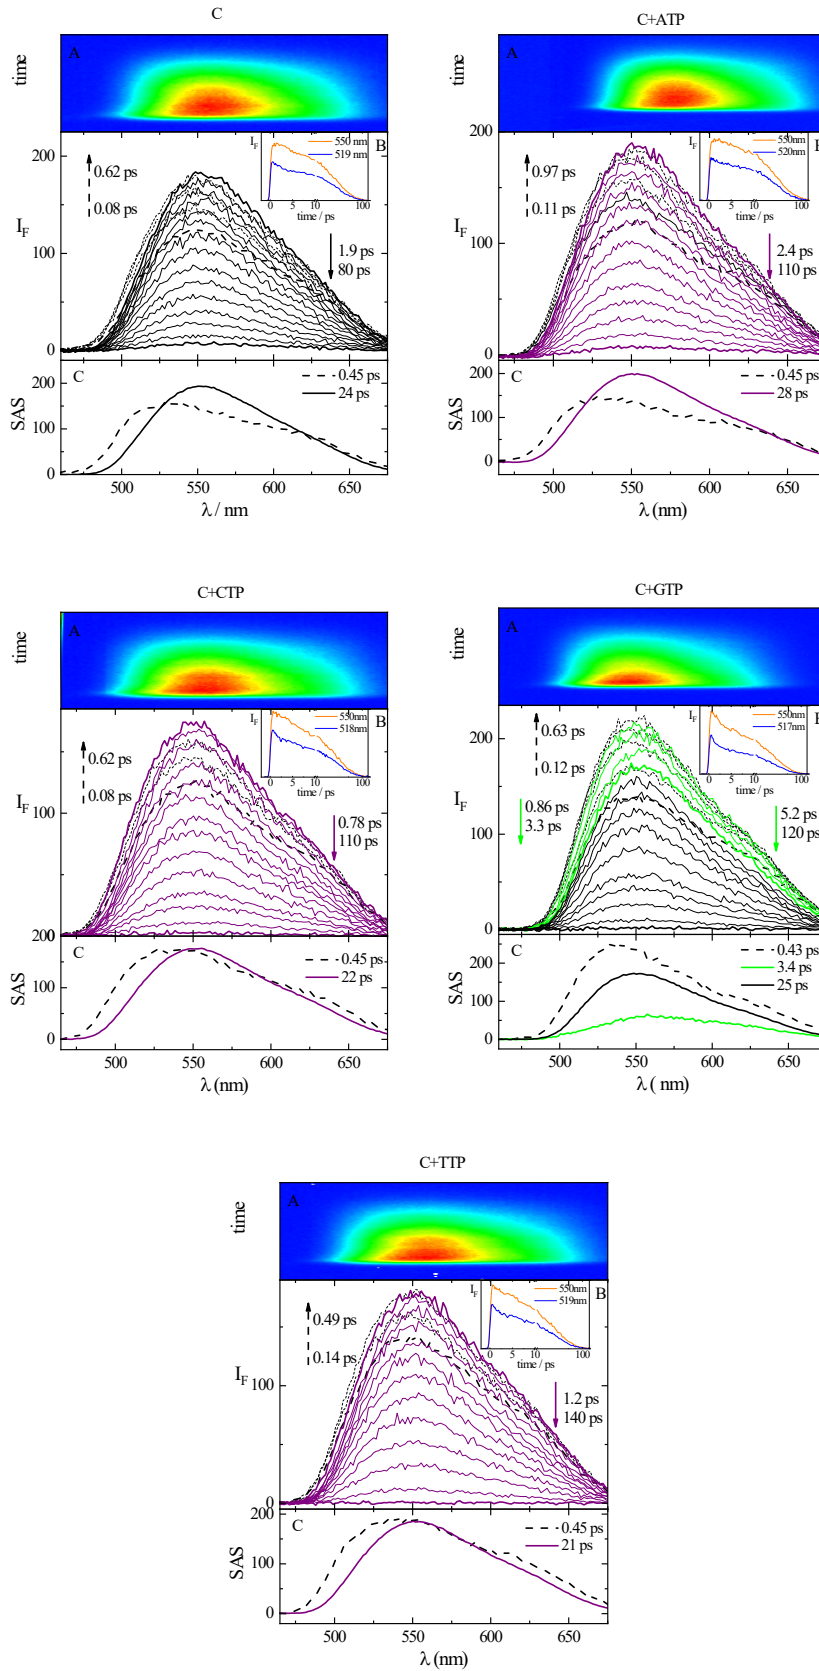

Figure S18. Femtosecond fluorescence up conversion measurements for compound **C** in buffer at pH 7 alone and in the presence of nucleotides (ca. 5 mM) with  $\lambda_{\text{pump}} = 400 \text{ nm}$ . Panel A: experimental 3D matrix; Panel B: representative spectra at different delay times and representative kinetics (inset) at different wavelengths; Panel C: Species Associated Spectra (SAS) obtained by Target Analysis.

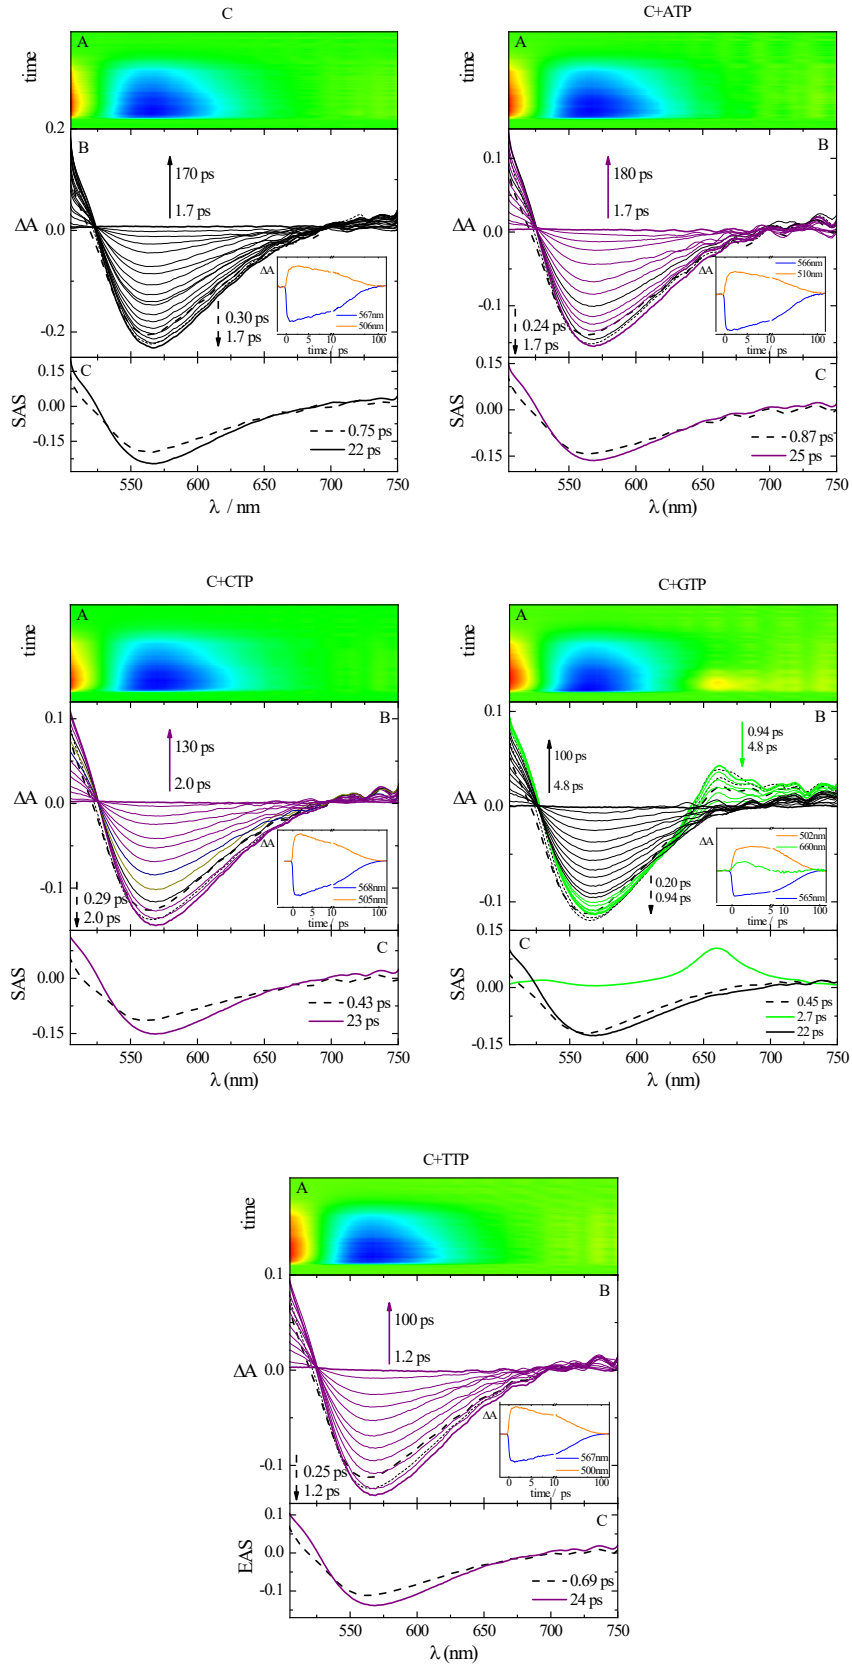

Figure S19. Femtosecond transient absorption measurements for compound **C** in buffer at pH 7 alone and in the presence of nucleotides (ca. 5 mM) with  $\lambda_{\text{pump}} = 400$  nm. Panel A: experimental 3D matrix; Panel B: representative spectra at different delay times and representative kinetics (inset) at different wavelengths; Panel C: Species Associated Spectra (SAS) obtained by Target Analysis.

Table S14. Results of Target Analysis of the femtosecond fluorescence up conversion and transient absorption data for compound **C** in buffer at pH 7 alone and in the presence of nucleotides (ca. 5 mM) with  $\lambda_{\text{pump}} = 400$  nm and relative assignments.

| Compound | Nucleotide | $\tau_{\text{FUC}}$ (ps) | $\tau_{\text{TA}}$ (ps) | Assignment                   |
|----------|------------|--------------------------|-------------------------|------------------------------|
| <b>C</b> | -          | 0.45<br>24               | 0.75<br>22              | Solvation<br>S1              |
|          | ATP        | 0.45<br>28               | 0.86<br>25              | Solvation<br>S1 free/complex |
|          | CTP        | 0.45<br>22               | 0.43<br>23              | Solvation<br>S1 free/complex |
|          | GTP        | 0.43<br>3.4              | 0.45<br>2.7             | Solvation<br>S1 complex      |
|          |            | 25                       | 22                      | S1 free                      |
|          | TTP        | 0.45<br>21               | 0.69<br>24              | Solvation<br>S1 free/complex |

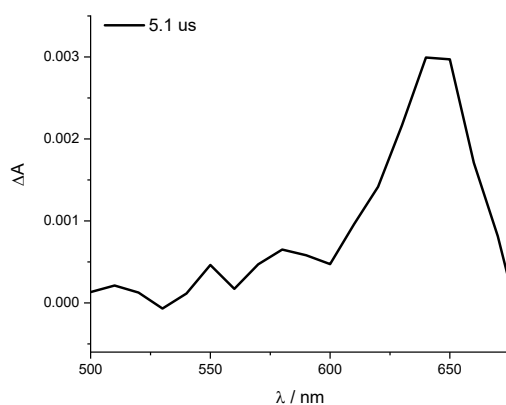

Figure S20. Nanosecond transient absorption spectrum for compound **C** ( $5 \times 10^{-5}$  M) in acetonitrile in the presence of *N,N*-diethylaniline (DEA, 0.1 M) obtained by laser flash photolysis with  $\lambda_{\text{pump}} = 355$  nm. No signal was detected in the control experiment with the same concentration of just compound **C** in acetonitrile.

- 1 A. Mazzoli, B. Carlotti, G. Consiglio, C. G. Fortuna, G. Miolo and A. Spalletti, *Photochem Photobiol Sci*, 2014, **13**, 939–950.
- 2 L. Mencaroni, C. Bonaccorso, V. Botti, B. Carlotti, G. Consiglio, F. Elisei, C. G. Fortuna, A. Spalletti and A. Cesaretti, *Dyes and Pigments*, 2021, **194**, 109620.
- 3 V. Botti, A. Cesaretti, Ž. Ban, I. Crnolatac, G. Consiglio, F. Elisei and I. Piantanida, *Org. Biomol. Chem.*, 2019, **17**, 8243–8258.
- 4 A. Cesaretti, L. Mencaroni, C. Bonaccorso, V. Botti, E. Calzoni, B. Carlotti, C. G. Fortuna, N. Montegiove, A. Spalletti and F. Elisei, *Molecules*, 2022, **27**, 3713.
- 5 M. Montalti, A. Credi, L. Prodi and M. T. Gandolfi, *Handbook of Photochemistry*, CRC Press, Boca Raton, 3rd edn., 2006.
- 6 T. Bianconi, A. Cesaretti, P. Mancini, N. Montegiove, E. Calzoni, A. Ekbote, R. Misra and B. Carlotti, *J. Phys. Chem. B*, 2023, **127**, 1385–1398.
- 7 A. Cesaretti, T. Bianconi, M. Coccimiglio, N. Montegiove, Y. Rout, P. L. Gentili, R. Misra and B. Carlotti, *J. Phys. Chem. C*, 2022, **126**, 10429–10440.
- 8 J. J. Snellenburg, S. Liptenok, R. Seger, K. M. Mullen and I. H. M. van Stokkum, *Journal of Statistical Software*, 2012, **49**, 1–22.
